# Supplementary material for: Certas programmable shunt valves with a "virtual off" for intrathecal chemotherapy delivery in infants with high-grade CNS tumors and hydrocephalus
Source: Research Square preprint supplement (doi:10.21203/rs.3.rs-4157739/v1), 2024-04-12
Supplement: Supplementary file 1 [file 84199030179aee9432b4d363.docx]

| F/U | Outcome | Sedation | Complications | Total injections | Topotecan | Cytosar +hydrocortisone | Pathology | Gender | AGE |  |
| --- | --- | --- | --- | --- | --- | --- | --- | --- | --- | --- |
| 5y | CR | no | no | 27 | 12 | 15 | ATRT | F | 1.7y | 1 |
| 5y | CR | yes | Shunt revision | 11 | - | 11 | Medulloblastoma | M | 3 y | 2 |
| 3y | CR | no | Fever somnolence | 12 | 6 | 6 | ATRT | M | 2.9y | 3 |
| 2y | PR | no | "stuck shunt" | 3 | - | 3 | Medulloblastoma | M | 1.1y | 4 |
|  | DOD | no | no | 5 | 5 | - | Rhabdomyosarcoma | F | 1.5y | 5 |

Table 1: Patient data. The numbers denote the number of injections of each agent. CR complete remission, PR partial remission, DOD died of disease.
